# Supplementary material for: Molecular mechanism underlying the selective attack of trehalose lipids on cancer cells as revealed by coarse-grained molecular dynamics simulations
Source: PubMed Central journal article supplement (PMC7820381; doi:10.1016/j.bbrep.2021.100913), 2021-01-20
Supplement: mmc6.pdf [file mmc6.pdf]

## Supporting Information for

### Molecular mechanism underlying the selective attack of trehalose lipids on cancer cells as revealed by coarse-grained molecular dynamics simulations

Ryosuke Hirano<sup>a,1</sup>, Takashi Kagamiya<sup>a,1</sup>, Yoko Matsumoto<sup>b</sup>, Tadaomi Furuta<sup>a,\*\*</sup>, Minoru Sakurai<sup>a,\*</sup>

<sup>a</sup> *School of Life Science and Technology, Tokyo Institute of Technology, B-62 4259, Nagatsuta-cho, Midori-ku, Yokohama 226-8501, Japan*

<sup>b</sup> *Division of Applied Life Science, Graduate School of Engineering, Sojo University, 4-22-1, Ikeda, Nishi-ku, Kumamoto 860-0082, Japan*

#### Details of the CGMD simulations

The CGMD simulations were performed with the Martini force field parameters (MARTINI ver 2.2) for lipids and sugars [1,2]. Water was modeled using the polarized water (PW) model [3]. The following simulation protocol was applied for every system: (i) 10,000 step steepest descent energy minimization, (ii) 30 ns equilibration under NPT conditions (310 K, 1 bar), and (iii) 15  $\mu$ s production runs under the same NPT conditions (several runs were extended to 30  $\mu$ s to confirm the maintenance of contact between the membranes). The production run for each system was repeated thrice. The time step was set to 20 fs. Electrostatic interactions were calculated using the reaction field method under the periodic boundary condition. The v-rescale thermostat [4] and Parrinello–Rahman barostat [5] were used to control the temperature and pressure, respectively. All CGMD simulations were performed using GROMACS 2016 (<http://manual.gromacs.org/documentation/2016/index.html>).

#### References

- [1] S.J. Marrink, H.J. Risselada, S. Yefimov, D.P. Tieleman, A.H. de Vries, The MARTINI force field: coarse grained model for biomolecular simulations. *J. Phys. Chem. B.* 111 (2007) 7812–7824.
- [2] López, C. A.; Rzepiela, A. J.; de Vries, A. H.; Dijkhuizen, L.; Hünenberger, P. H.; Marrink, S. J. Martini coarse-grained force field: extension to carbohydrates. *J. Chem. Theory Comput.* 5 (2009) 3195–3210.
- [3] Yesylevskyy, S. O.; Schäfer, L. V.; Sengupta, D.; Marrink, S. J. Polarizable water model for the coarse-grained MARTINI force field, *PLoS Comput. Biol.* 6 (2010) e1000810.
- [4] Bussi, G.; Donadio, D.; Parrinello, M. Canonical sampling through velocity rescaling. *J. Chem. Phys.* 126 (2007) 014101.
- [5] Parrinello, M.; Rahman, A. Polymorphic transitions in single crystals: a new molecular dynamics method. *J. Appl. Phys.* 52 (1981) 7182–7190.

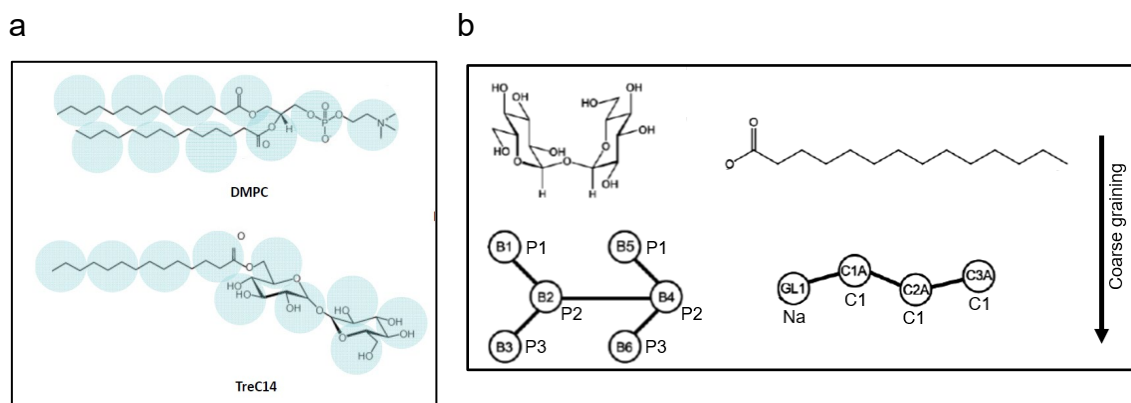

**Figure S1. Chemical structures of DMPC and TreC14.** (a) Chemical structures of DMPC (top) and TreC14 (bottom), and their CG representations. CG particles are represented by cyan circles. (b) CG particle types of TreC14: head and tail parts are shown in left and right, respectively.

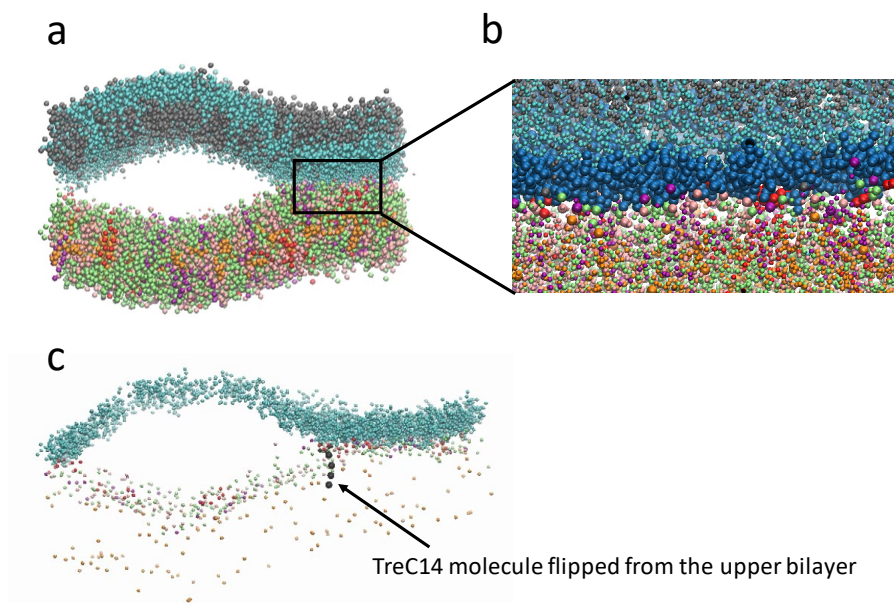

**Figure S2. The snapshot structure at 15  $\mu$ s in a 400 K simulation.** (a) DMTreC14 and cancer cell membranes, (b) the close-up view of the contact region, and (c) the flipped TreC14 molecule. In (b), the beads of the head group are illustrated using spheres larger than those used for the fatty acid tails. The head group beads of the two proximal layers are merged. In (c), only the head group beads are shown.

**Table S1. Lipid composition (number of molecules) of the extracellular and cytoplasmic monolayers of normal and cancer cell models**

| lipid species | Normal        |             | Cancer        |             |
|---------------|---------------|-------------|---------------|-------------|
|               | extracellular | cytoplasmic | extracellular | Cytoplasmic |
| PC            | 248           | 76          | 212           | 212         |
| PE            | 30            | 98          | 120           | 120         |
| PS            | 0             | 64          | 40            | 40          |
| PI            | 0             | 32          | 24            | 24          |
| SM            | 37            | 11          | 0             | 0           |
| CHL           | 206           | 240         | 123           | 123         |
| Total         | 521           | 521         | 519           | 519         |

**Table S2. Lipid compositions of cancer and normal cells**

| lipid name | cancer cell | normal cell | fatty acid tails                         |            |
|------------|-------------|-------------|------------------------------------------|------------|
| DPPC       | 0           | 98          | 1,2-dipalmitoyl                          | di-C16:0   |
| MOPC       | 16          | 0           | 1-Margaroyl-2-oleoyl                     | C17:0/18:1 |
| POPC       | 148         | 114         | 1-palmitoyl-2-oleoyl                     | C16:0/18:1 |
| PIPC       | 164         | 48          | 1-palmitoyl-2-linoleoyl                  | C16:0/18:2 |
| PQPC       | 16          | 16          | 1-palmitoyl-2-(5Z,8Z,11Z-eicosatrienoyl) | C16:0/18:3 |
| PAPC       | 16          | 32          | 1-stearoyl-2-arachidonoyl                | C16:0/20:4 |
| PUPC       | 16          | 0           | 1-palmitoyl-2-docosahexaenoyl            | C16:0/22:6 |
| PIPC       | 16          | 0           | 1-palmitoyl-2-linoleoyl                  | C16:0/18:2 |
| PPC        | 32          | 16          | 2-palmitoyl                              | C16:0      |
| PIPE       | 32          | 16          | 1-palmitoyl-2-linoleoyl                  | C16:0/18:2 |
| PAPE       | 48          | 16          | 1-stearoyl-2-arachidonoyl                | C16:0/20:4 |
| PUPE       | 48          | 48          | 1-palmitoyl-2-docosahexaenoyl            | C16:0/22:6 |
| OQPE       | 16          | 0           | 1-oleoyl-2-(5Z,8Z,11Z-eicosatrienoyl)    | C18:1/20:3 |
| OAPE       | 32          | 32          | 1-oleoyl-2-arachidonoyl                  | C18:1/20:4 |
| OIPE       | 32          | 0           | 1-oleoyl-2-linoleoyl                     | C18:1/18:2 |
| DIPE       | 16          | 0           | 1,2-dilinoleoyl                          | di-C16:2   |
| PPE        | 16          | 16          | 2-palmitoyl                              | C16:0      |
| POPS       | 32          | 16          | 1-palmitoyl-2-oleoyl                     | C16:0/18:1 |
| DPPS       | 0           | 16          | 1,2-dipalmitoyl                          | di-C16:0   |
| PIPS       | 32          | 16          | 1-palmitoyl-2-linoleoyl                  | C16:0/18:2 |
| PAPS       | 16          | 0           | 1-stearoyl-2-arachidonoyl                | C16:0/20:4 |
| PUPS       | 0           | 16          | 1-palmitoyl-2-docosahexaenoyl            | C16:0/22:6 |
| DPPI       | 16          | 16          | 1,2-dipalmitoyl                          | di-C16:0   |
| POPI       | 16          | 0           | 1-palmitoyl-2-oleoyl                     | C16:0/18:1 |
| PAPI       | 16          | 16          | 1-stearoyl-2-arachidonoyl                | C16:0/20:4 |
| DPSM       | 0           | 48          | N-stearoyl-D-erythro                     | C18:1/18:0 |
| CHL        | 246         | 446         | -                                        | -          |

Cited from ref. 22 in text. The cancer and normal cells correspond to leukemic (GRSL) cells and normal murine thymocytes, respectively.
